# Supplementary material for: Accelerated aging in normal breast tissue of women with breast cancer
Source: PubMed Central journal article supplement (PMC8140515; doi:10.1186/s13058-021-01434-7), 2021-05-22

**Additional file 1: Figure S1 Identification and validation of age-related DNA methylation sites in TCGA breast normal adjacent tissue.**

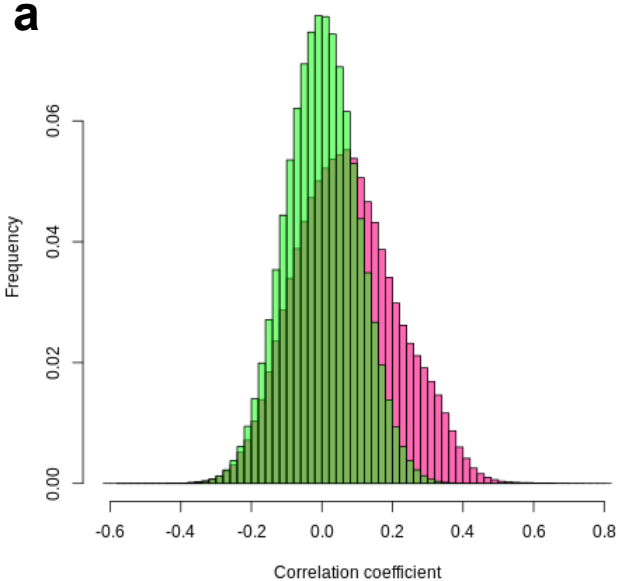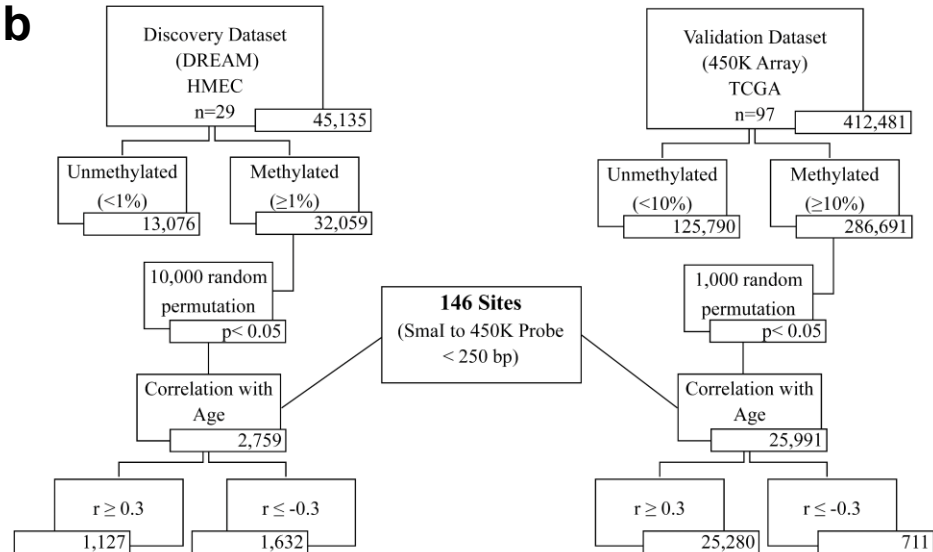

Supplement: 13058_2021_1434_MOESM1_ESM.pdf [file 13058_2021_1434_MOESM1_ESM.pdf]
