# Supplementary material for: Accelerated aging in normal breast tissue of women with breast cancer
Source: PubMed Central journal article supplement (PMC8140515; doi:10.1186/s13058-021-01434-7), 2021-05-22

## Additional file 2: Figure S2 Genomic distribution of validated aging sites and direction of age-related changes across assay platforms

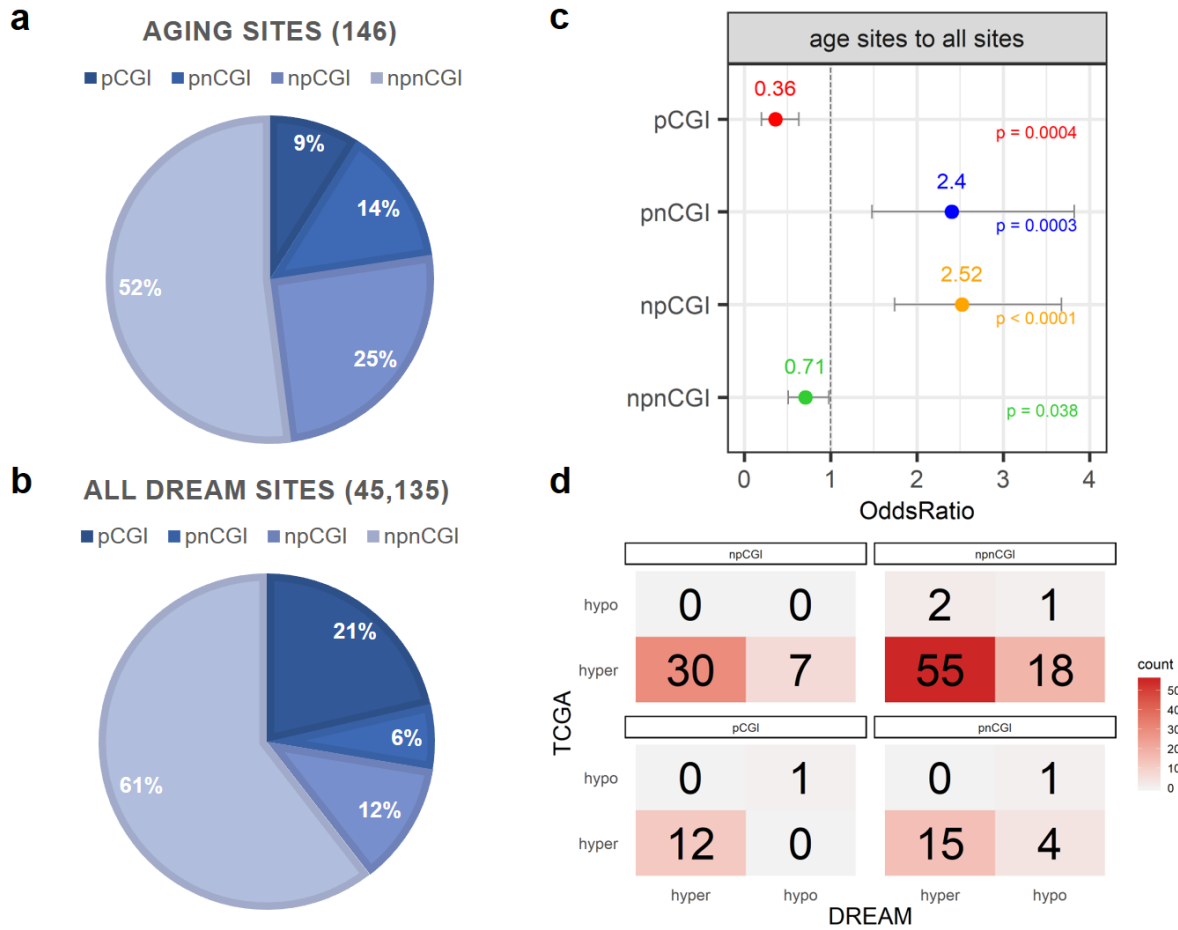

Supplement: 13058_2021_1434_MOESM2_ESM.pdf [file 13058_2021_1434_MOESM2_ESM.pdf]
