# Supplementary material for: Accelerated aging in normal breast tissue of women with breast cancer
Source: PubMed Central journal article supplement (PMC8140515; doi:10.1186/s13058-021-01434-7), 2021-05-22

### Additional file 3: Figure S3 PCA analysis of age-related methylation sites

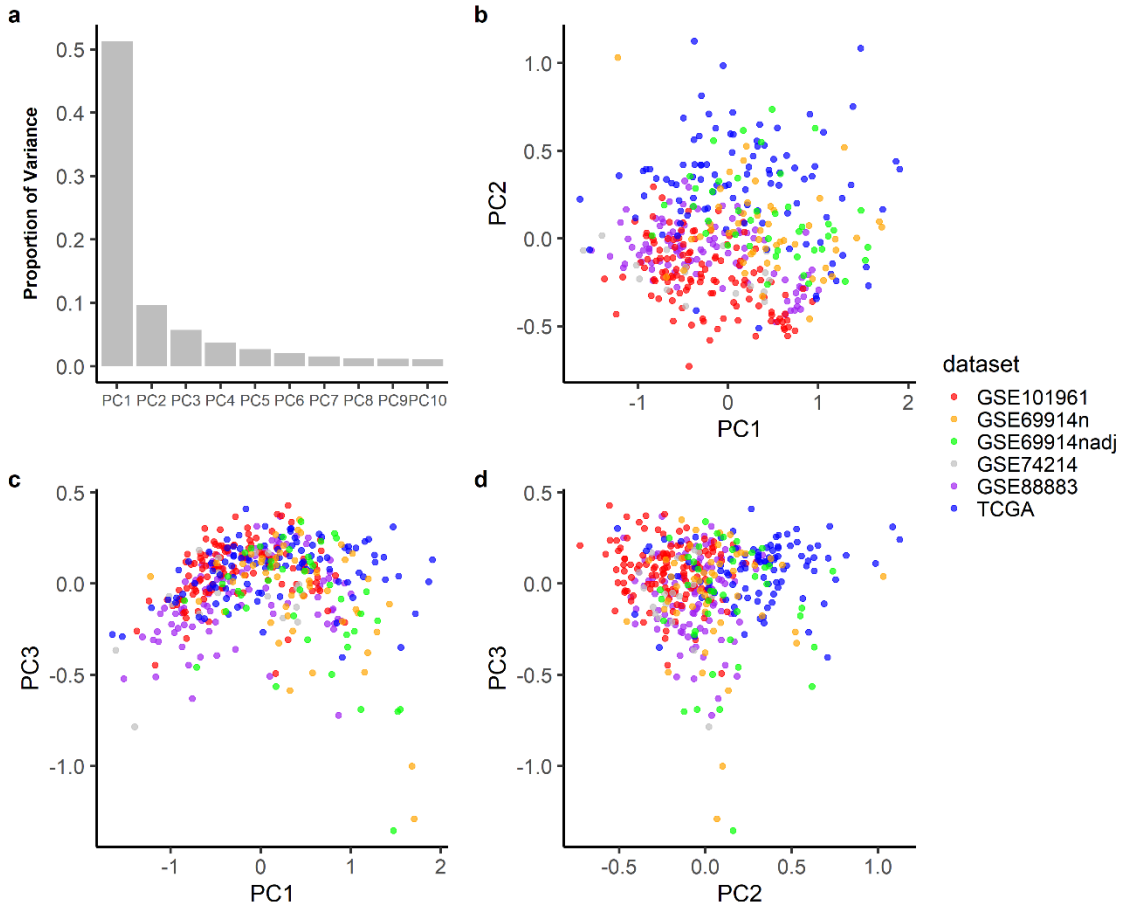

Supplement: 13058_2021_1434_MOESM3_ESM.pdf [file 13058_2021_1434_MOESM3_ESM.pdf]
