# Supplementary material for: Accelerated aging in normal breast tissue of women with breast cancer
Source: PubMed Central journal article supplement (PMC8140515; doi:10.1186/s13058-021-01434-7), 2021-05-22

## Additional file 4: Figure S4 Outlier analysis using Horvath's 353 CpG probes

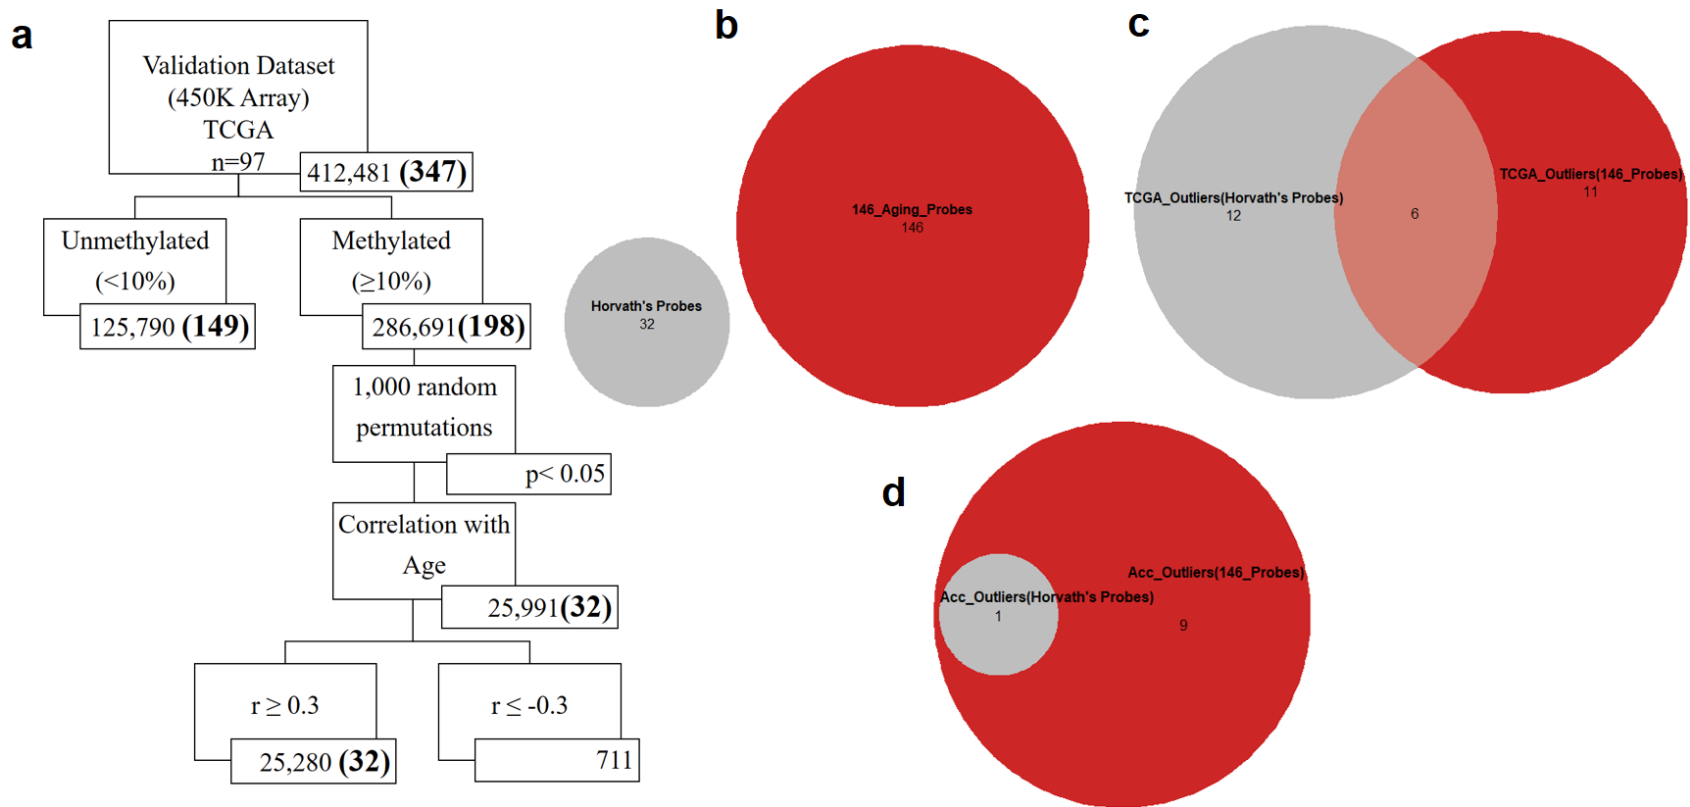

Supplement: 13058_2021_1434_MOESM4_ESM.pdf [file 13058_2021_1434_MOESM4_ESM.pdf]
