# Supplementary material for: Accelerated aging in normal breast tissue of women with breast cancer
Source: PubMed Central journal article supplement (PMC8140515; doi:10.1186/s13058-021-01434-7), 2021-05-22
Supplement: 13058_2021_1434_MOESM5_ESM.pdf [file 13058_2021_1434_MOESM5_ESM.pdf]

## Additional file 5: Table S1 clinical parameters of the TCGA dataset

|                           | Not Outlier (n=80) | Outlier (not accelerated) (n=7) | Accelerated Outlier (n=10) | p-value                     |
|---------------------------|--------------------|---------------------------------|----------------------------|-----------------------------|
| Chron Mean Age            | 57                 | 58                              | 61                         | ns                          |
| <b>Pred Mean Age</b>      | <b>56</b>          | <b>50</b>                       | <b>88</b>                  | <b>1.62x10<sup>-8</sup></b> |
| Stage I                   | 9/79 (11%)         | 3/7 (43%)                       | 2/10 (20%)                 | ns                          |
| Stage II A, B             | 52/79 (66%)        | 4/7 (57%)                       | 5/10 (50%)                 | ns                          |
| Stage III A, B, C         | 17/79 (22%)        | 0/7 (57%)                       | 3/10 (30%)                 | ns                          |
| Stage IV                  | 1/79 (1.2%)        | 0/7                             | 0/10                       | ns                          |
| MDLC                      | 8/80 (10%)         | 0/7                             | 1/10 (10%)                 | ns                          |
| IDC                       | 64/80 (80%)        | 7/7 (100%)                      | 8/10 (80%)                 | ns                          |
| ILC                       | 7/80 (9%)          | 0/7                             | 1/10 (10%)                 | ns                          |
| Paget's disease           | 1/80 (1.3%)        | 0/7                             | 0/8                        | ns                          |
| Post Menopause            | 44/66 (67%)        | 4/7 (57%)                       | 6/8 (75%)                  | ns                          |
| Pre-menopause             | 20/66 (30%)        | 3/7 (43%)                       | 2/8 (25%)                  | ns                          |
| Perimenopause             | 2/66 (3%)          | 0/7                             | 0/8                        | ns                          |
| Asian                     | 1/79 (1.2%)        | 0/7                             | 0/7                        | ns                          |
| Black or African American | 3/79 (3.8%)        | 0/7                             | 1/10 (10%)                 | ns                          |
| White                     | 75/79 (95%)        | 7/7 (100%)                      | 9/10 (90%)                 | ns                          |
| Prior cancer              | 2/80 (2.5%)        | 0/7                             | 1/10 (10%)                 | ns                          |
| ER+                       | 59/72 (82%)        | 5/7 (71%)                       | 5/6 (83%)                  | ns                          |
| HER2+                     | 3/61 (4.9%)        | 0/6                             | 0/5                        | Ns                          |
| TN                        | 7/61 (11%)         | 1/6 (17%)                       | 1/5 (20%)                  | ns                          |

**Comparison of TCGA clinical parameters.** Comparison of different variables was done between the not-outlier and outlier samples and accelerated outliers. The outlier status in this analysis was based off the aging methylation data of 427 patients. Chron Mean Age and Pred Mean Age are chronological and predicted average ages respectively. Mixed ductal lobular carcinoma (MDLC), Invasive ductal carcinoma (IDC), Invasive lobular carcinoma (ILC). TN is triple negative. The significant p-value was generated by ANOVA testing followed by Tukey's HSD post hoc test.
